# Supplementary material for: The small G protein Arl5 contributes to endosome-to-Golgi traffic by aiding the recruitment of the GARP complex to the Golgi
Source: PubMed Central journal article supplement (PMC4400590; doi:10.1242/bio.201410975), 2015-03-20
Supplement: supp_bio.201410975_bio.201410975-s1.pdf [file supp_bio.201410975_bio.201410975-s1.pdf]

## Supplementary Material

Cláudia Rosa-Ferreira et al. doi: 10.1242/bio.201410975

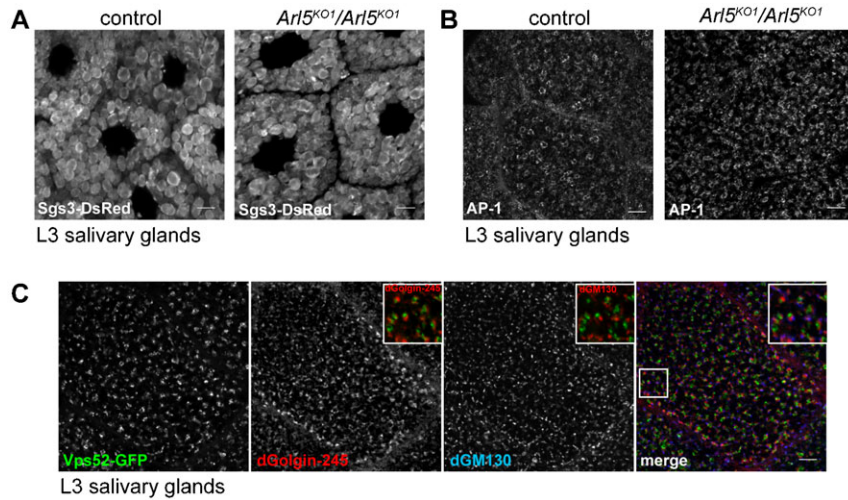

**Fig. S1. *Arl5* is not required for AP-1-dependent secretory granule formation.** (A) Confocal micrographs of control (*w1118*) and of the *Arl5<sup>KO1</sup>* mutant (*Arl5<sup>KO1</sup>/Arl5<sup>KO1</sup>*) mid/late L3 larval salivary glands expressing the glue protein Sgs3-DsRed. There were no obvious discrepancies in the number and size of secretory granules, marked by Sgs3, between control and the *Arl5<sup>KO1</sup>* mutant. (B) *Arl5* is not required for AP-1 recruitment, necessary for glue granule biogenesis. Endogenous AP-1 is found around glue granules in both control (*w1118*) and *Arl5<sup>KO1</sup>* mutant (*Arl5<sup>KO1</sup>/Arl5<sup>KO1</sup>*) L3 larval salivary glands. (C) Confocal micrographs of L3 larval salivary glands show that the GARP complex, marked by the exogenous expression of Vps52-GFP, localizes to the TGN as it is found next to dGolgin-245 (red) and further apart from dGM130 (blue). Insets correspond to the boxed area, with Vp52-GFP in green and the indicated markers in red. Scale bars are 10  $\mu$ m.

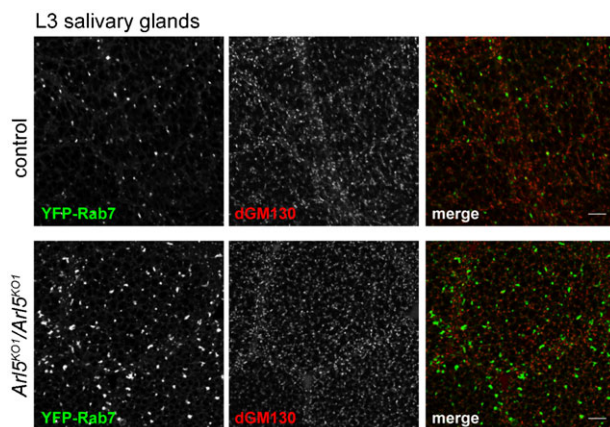

**Fig. S2. Loss of *Arl5* leads to the accumulation of swollen lysosomes in L3 larval salivary glands.** Similarly to what has been observed in epithelial follicle cells, loss of *Arl5* (*Arl5<sup>KO1</sup>/Arl5<sup>KO1</sup>*) in L3 larval salivary glands results in the accumulation of swollen structures positive for YFP-Rab7 (green), in comparison to control salivary glands (*w1118*). The cis-Golgi, represented by dGM130 (red) remains unaffected by the loss of *Arl5*. Scale bars are 10  $\mu$ m.

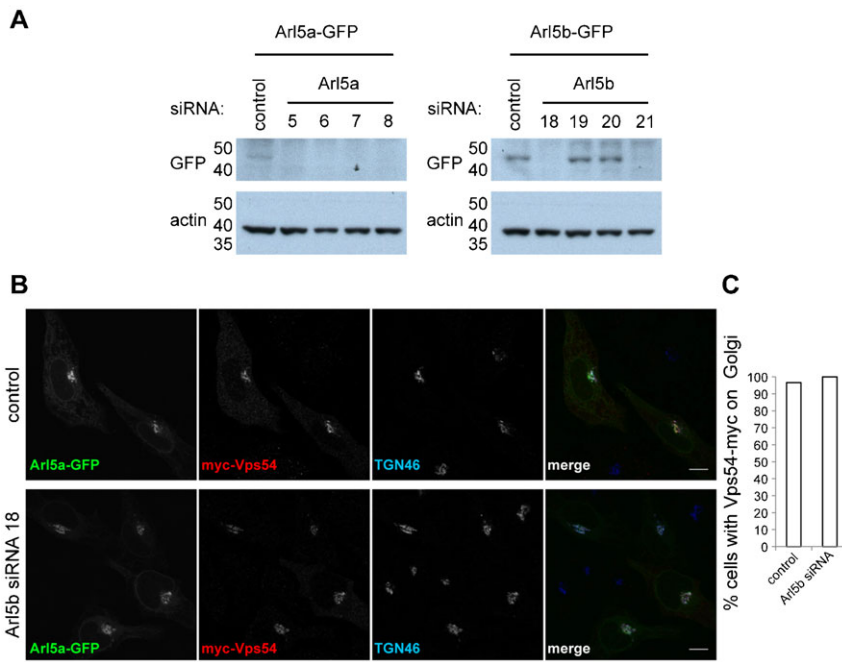

**Fig. S3. Depletion of Arl5a or Arl5b by siRNA.**

(A) Immunoblots of HeLa cells lysates expressing Arl5a-GFP or Arl5b-GFP and silenced for mock (control) or the indicated proteins (Arl5a or Arl5b) targeted by four different siRNAs each (5 to 8 for knockdown of Arl5a and 18 to 21 for Arl5b). The knockdown levels of the referred transgenes were evaluated by the decrease in the GFP bands, corresponding to either Arl5a-GFP or Arl5b-GFP, assuming equal amounts of total proteins for each sample by probing for  $\beta$ -Actin. (B) Confocal micrographs of HeLa cells expressing Arl5a-GFP (green) and myc-Vps54 (red) and depleted of mock (control) or Arl5b with siRNAs. After fixation the cells were stained for the myc-tag and TGN46 (blue). Expression of Arl5a-GFP was sufficient to rescue the mislocalization of myc-Vps54 upon depletion of Arl5b. Scale bars are 10  $\mu$ m. (C) Quantification of the effect on the localization of myc-Vps54 of the rescue by Arl5a-GFP of Arl5b siRNA.

Table S1: See supplementary webpage

Table S2: See supplementary webpage
